# Supplementary material
Source: MDPI journal article supplement (https://www.mdpi.com/2673-6284/10/4/23)
Supplement: s1 [file s1]

## Supplementary Materials

### Primer Binding Site (PBS) Profiling of Genetic Diversity of Natural Populations of Endemic Species *Allium ledebourianum* Schult.

Oxana Khapilina <sup>1,\*</sup>, Ainur Turzhanova <sup>1</sup>, Alevtina Danilova <sup>2</sup>, Asem Tumenbayeva <sup>1</sup>, Vladislav Shevtsov <sup>1</sup>,  
Yuri Kotukhov <sup>2</sup>, Ruslan Kalendar <sup>3,4,\*</sup>

<sup>1</sup> National Center for Biotechnology, Korgalzhin hwy 13/5, 010000, Nur-Sultan, Kazakhstan; turzhanova-ainur@mail.ru (A.T.); asem.tumenbaeva2016@mail.ru (A.T.); xatabadich@gmail.com (V.S.)

<sup>2</sup> Altai Botanical Garden, Yermakova Str 1, 070000, Ridder, Kazakhstan; a-n-danilova@yandex.ru (A.D.); sumbembayev@gmail.com (Y.K.)

<sup>3</sup> National Laboratory Astana, Nazarbayev University, 010000, Nur-Sultan, Kazakhstan

<sup>4</sup> Helsinki Institute of Life Science HiLIFE, Biocenter 3, Viikinkaari 1, University of Helsinki, FI-00014, Helsinki, Finland

\* **Correspondence:** oksfur@mail.ru (O.K.); ruslan.kalendar@helsinki.fi (R.K.); Tel.: +358294158869 (R.K.)

**O.K.:** oksfur@mail.ru

**A.T.:** turzhanova-ainur@mail.ru

**A.D.:** a-n-danilova@yandex.ru

**A.T.:** asem.tumenbaeva2016@mail.ru

**V.S.:** xatabadich@gmail.com

**Y.K.:** sumbembayev@gmail.com

**R.K.:** ruslan.kalendar@helsinki.fi

ORCID 0000-0002-7256-568X ScopusID 57194829297

Scopus 57216895766

Scopus 57221397308

Scopus 57216894029

Scopus 57216896596

ORCID 0000-0002-7700-5390 ScopusID 56946858600

ORCID 0000-0003-3986-2460 ScopusID 6602789279

**Running Head:** DNA profiling and assessment of genetic diversity of endemic *Allium ledebourianum*

**Abbreviations:** PBS: primer binding site; LTR: long terminal repeat

**Key words:** *Allium ledebourianum* Schult.; DNA molecular marker; genetic diversity; iPBS amplification

**Supplementary Table S1.** Statistical measure of genetic diversity of *A. ledebourianum*. based on inter-primer binding-site markers.

| Population ID | N  | NTI | PPL (%) | I     | He    | uHe   | Na    | Ne    |
|---------------|----|-----|---------|-------|-------|-------|-------|-------|
| LD6           | 11 | 251 | 34.3    | 0.198 | 0.131 | 0.137 | 1.257 | 1.218 |
| LD20          | 11 | 221 | 40.0    | 0.165 | 0.108 | 0.114 | 1.114 | 1.178 |
| LD64          | 11 | 156 | 40.0    | 0.223 | 0.152 | 0.159 | 0.971 | 1.270 |
| MV            |    |     | 38.1    | 0.195 | 0.130 | 0.136 | 1.114 | 1.222 |
| SE            |    |     | 1.9%    | 0.027 | 0.018 | 0.019 | 0.078 | 0.033 |

**Supplementary Table S2.** Summary AMOVA analysis of *A. ledebourianum* populations using iPBS markers.

| Source      | df | SS      | MS     | Est. Var. | %   | $\phi_{PT}$ |
|-------------|----|---------|--------|-----------|-----|-------------|
| Among Pops  | 2  | 120.909 | 60.455 | 5.264     | 67  | 0.674       |
| Within Pops | 30 | 76.545  | 2.552  | 2.552     | 33  |             |
| Total       | 32 | 197.455 |        | 7.815     | 100 |             |

Levels of significance are based on 999 iteration steps and are indicated by three ( $p < 0.001$ ) asterisks SS the sum of squares. MS mean squares. % proportion of genetic variability

**Supplementary Table S3.** Summary statistics of Spearman's rank for morphological and vegetation traits of *A. ledebourianum* in wild populations.

| Sign                                                    | Ground germination (%) | Weight 1000 pcs. g | Number of seeds per inflorescence | Semenification rate (%) | Real seed production of one generative shoot. pcs. | Potential seed production of one generative shoot. pcs. | % of boll formation per bush | Number of bolls per bush | Fruit formation (%) | Number of bolls per inflorescence. pcs. | Number of flowers per inflorescence. pcs. | Shoot height in the flowering phase (min/max). cm |
|---------------------------------------------------------|------------------------|--------------------|-----------------------------------|-------------------------|----------------------------------------------------|---------------------------------------------------------|------------------------------|--------------------------|---------------------|-----------------------------------------|-------------------------------------------|---------------------------------------------------|
| Height above sea level. m                               | 0.919                  | -0.836             | -0.997                            | -0.300                  | -0.219                                             | -0.175                                                  | -0.918                       | -0.984                   | 0.762               | 0.567                                   | -0.167                                    | -0.827                                            |
| Shoot height in the flowering phase (min/max). cm       | -0.538                 | -0.383             | 0.778                             | 0.785                   | 0.730                                              | 0.698                                                   | 0.536                        | 0.713                    | -0.266              | -0.006                                  | 0.692                                     |                                                   |
| Number of flowers per inflorescence. pcs.               | 0.236                  | -0.402             | 0.085                             | 0.991                   | 0.999*                                             | 1.000**                                                 | -0.239                       | -0.013                   | 0.512               | 0.718                                   |                                           |                                                   |
| Number of bolls per inflorescence. pcs.                 | 0.846                  | -0.926             | -0.633                            | 0.615                   | 0.679                                              | 0.712                                                   | -0.848                       | -0.706                   | 0.966               |                                         |                                           |                                                   |
| Fruit formation (%)                                     | 0.956                  | -0.992             | -0.813                            | 0.389                   | 0.465                                              | 0.505                                                   | -0.957                       | -0.866                   |                     |                                         |                                           |                                                   |
| Number of balls per bush                                | -0.975                 | 0.921              | 0.995                             | 0.124                   | 0.040                                              | -0.005                                                  | 0.974                        |                          |                     |                                         |                                           |                                                   |
| % of boll formation per bush                            | -1.000**               | 0.985              | 0.947                             | -0.103                  | -0.187                                             | -0.231                                                  |                              |                          |                     |                                         |                                           |                                                   |
| Potential seed production of one generative shoot. pcs. | 0.228                  | -0.395             | 0.093                             | 0.992                   | 0.999*                                             |                                                         |                              |                          |                     |                                         |                                           |                                                   |
| Real seed production of one generative shoot. pcs.      | 0.184                  | -0.353             | 0.138                             | 0.996                   |                                                    |                                                         |                              |                          |                     |                                         |                                           |                                                   |
| Productivity rate.%                                     | 0.101                  | -0.273             | 0.221                             |                         |                                                    |                                                         |                              |                          |                     |                                         |                                           |                                                   |
| Number of seeds per inflorescence                       | -0.948                 | 0.878              |                                   |                         |                                                    |                                                         |                              |                          |                     |                                         |                                           |                                                   |
| Weight 1000 pcs. g                                      | -0.985                 |                    |                                   |                         |                                                    |                                                         |                              |                          |                     |                                         |                                           |                                                   |

Significance values are \*\* =  $p \leq 0.001$ ; \* =  $p \leq 0.05$  The F-values are provided with significance level indicated by the asterisks

**Supplementary Table S4.** Summary statistics of Spearman's rank correlations for shoot height, fruit formation coefficient, productivity rate and soil germination of *A. ledebourianum* with the genetic variation.

| Variables                   | $\rho$ | p     | Sign |
|-----------------------------|--------|-------|------|
| Shoot height                |        |       |      |
| SI                          | 0.63   | 0.56  | n.s. |
| PB                          | 0.9    | 0.000 | ***  |
| He                          | 0.58   | 0.000 | n.s. |
| Fruit formation coefficient |        |       |      |
| SI                          | 0.59   | 0.6   | n.s. |
| PB                          | 0.18   | 0.000 | ***  |
| He                          | 0.63   | 0.56  | n.s. |
| Productivity rate           |        |       |      |
| SI                          | 0.97   | 0.14  | n.s. |
| PB                          | 0.98   | 0.000 | ***  |
| He                          | 0.96   | 0.17  | n.s. |
| Soil germination            |        |       |      |
| SI                          | 0.32   | 0.79  | n.s. |
| PB                          | -0.12  | 0.000 | ***  |
| He                          | 0.37   | 0.75  | n.s. |
